# Supplementary material
Source: MDPI journal article supplement (https://www.mdpi.com/2079-6412/13/7/1212)

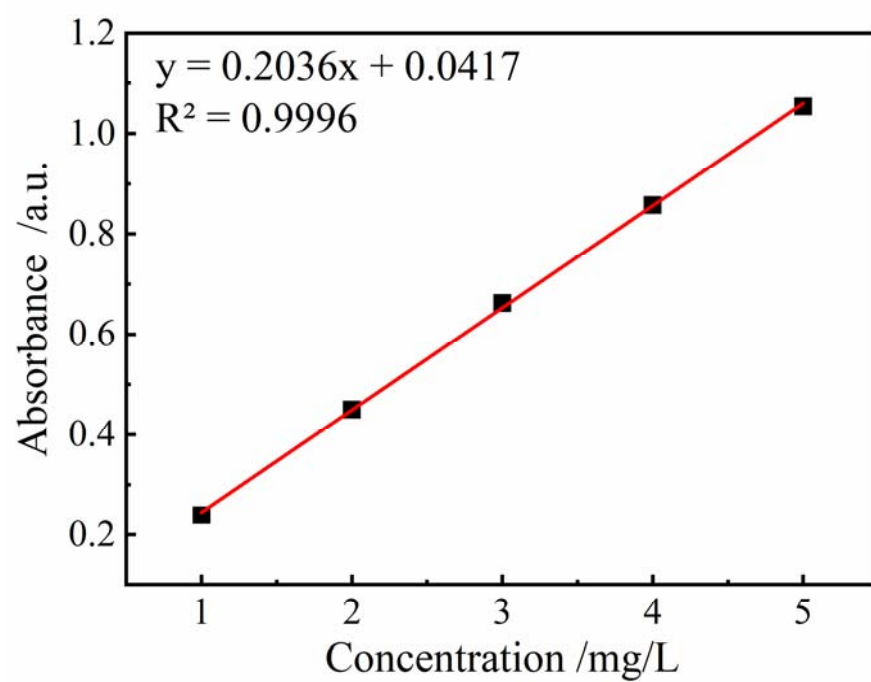

**Fig. S1** The standard curve titration diagram of RhB solution.

Supplement: s1 [file s1]
